# Supplementary material
Source: PubMed Central journal article supplement (PMC3538329)

## Supplementary Methods:

To examine global gene expression in human cord blood derived MKs, CD34<sup>+</sup> hematopoietic progenitor cells (HPCs) were isolated from human umbilical cord blood and differentiated into MKs as previously described.<sup>20</sup> Briefly, freshly isolated CD34<sup>+</sup> HPCs were cultured in CellGro SCGM medium (CellGenix, Germany) in the presence of thrombopoietin (TPO) (100ng/ml, CellGenix) and IL-1 $\beta$  (Miltenyi, Germany) for 10 days. To reflect the CHRF-288-11 experiments, on day 10 cells were left untreated or treated with Wnt3a (600 ng/mL) or Wnt5a (600 ng/mL). After 8 hours RNA was harvested and subjected to whole genome microarray analysis (Illumina HumanHT-12 v4 Expression BeadChip) as outlined in the results section of the manuscript entitled “Microarray Analysis”.

## Supplementary Figure Legends:

**Supplementary Figure 1: Comparative gene expression profiling of *in vitro* differentiated MKs (derived from CD34<sup>+</sup> cord blood progenitors) and CHRF 288-11 cells indicates that components of the Wnt signalling pathway are expressed at comparable levels in MKs and CHRF cells.** (A) Heatmap showing expression levels of Wnt signalling pathway components in CHRF (columns 1-4) and *in vitro* differentiated MKs (columns 5-8). (B) Scatterplot showing similar expression levels of Wnt signalling pathway components in CHRF and MK cells. Dotted lines indicate 2 fold differential expression.

**Supplementary Figure 2: Heatmap analysis of Wnt target gene expression data from cultured primary human MKs treated with Wnt3a or Wnt5a.** (A) Expression in treated/untreated primary MKs of the subset of genes which were upregulated by Wnt3a or Wnt5a in CHRF-288-11 cells. (B) Expression in treated/untreated primary MKs of the subsets of genes downregulated by Wnt3a or Wnt5a in CHRF-288-11 cells. Darker purple coloured heatmap tiles indicate higher expression of these genes. Data presented represents the mean (where applicable) normalised signal intensity of n=2 untreated samples, n=1 Wnt3a treated samples and n=3 Wnt5a treated samples. Samples were derived from replicate cultures of a single umbilical cord blood CD34<sup>+</sup> cell harvest. To reflect the CHRF-288-11 experiments (Manuscript Figure 3), cells were treated after 10 days in MK culture (see methods). After 8 hours RNA was harvested and subjected to whole genome microarray analysis (Illumina HumanHT-12 v4 Expression BeadChip). While some differences are observed, and indeed should be expected between the cell line CHRF-288-11 model and the primary cultured MK cells, here we see a considerable overlap in gene regulation between the two analyses, strongly suggesting that these genes are valid targets of Wnt signaling in a megakaryocytic setting.

**Supplementary Table 1: Genes differentially expressed between untreated cells and cells treated with Wnt3a (150ng/ml), Wnt5a (600ng/ml) and a combination of both agonists.**

Values indicate the fold difference measured between each test sample and the untreated control. Values in green indicate upregulation when compared with untreated control, while values in red indicate downregulation.

**A**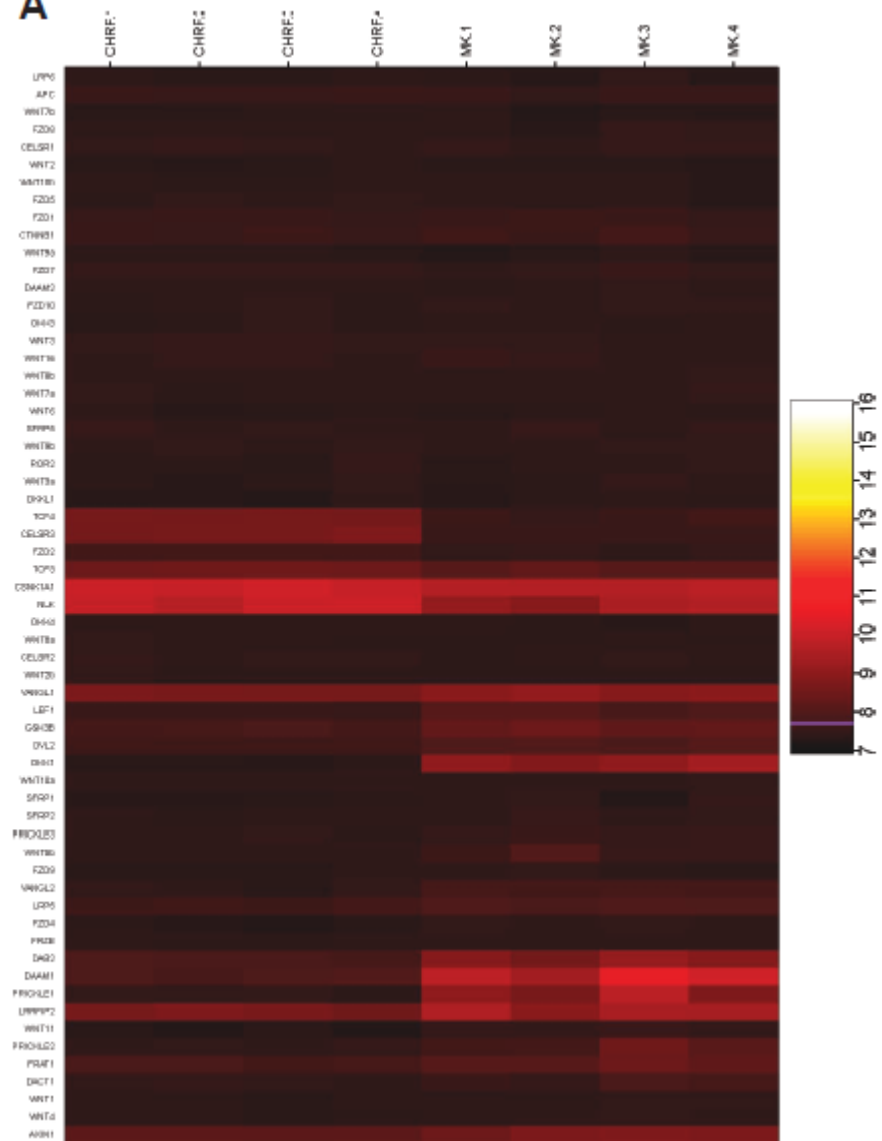**B**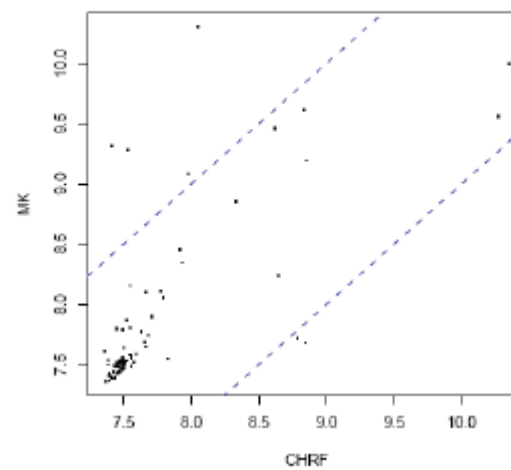

**A**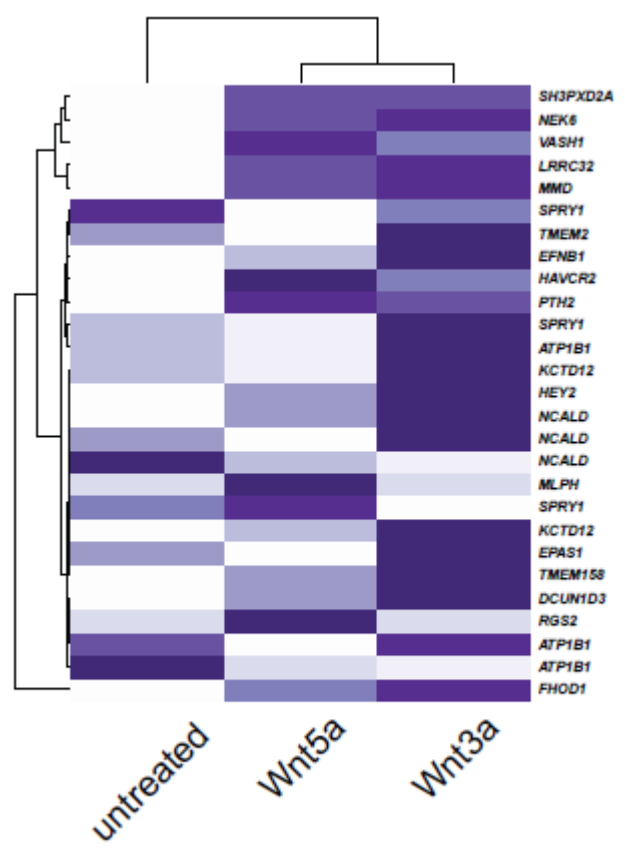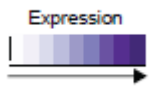**B**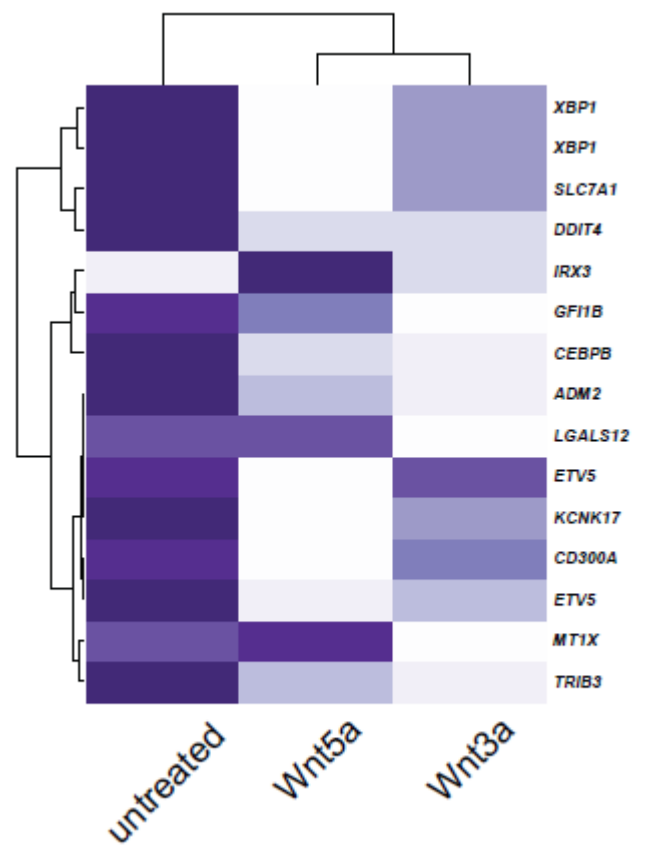

Supplement: supp_blood-2012-03-416875_blood-2012-03-416875-1.pdf [file supp_blood-2012-03-416875_blood-2012-03-416875-1.pdf]
